# Supplementary material
Source: Elsevier journal article supplement (https://www.sciencedirect.com/science/article/pii/S0300289621001071)
Supplement: mmc1 [file S0300289621001071:mmc1.doc]

# ONLINE SUPPLEMENT

# Title: Effectiveness and Safety of Inhaled Antibiotics in Patients with Chronic Obstructive Pulmonary Disease. A Multicentre Observational Study

**e-Table 1:** Details on the Inhaled Antibiotics Prescribed to All Patients in the Study. N = 693.

| **Type of IA** | **N (%)** |
| --- | --- |
| Colistimethate sodium  Tobramycin  Ceftazidime  Gentamicin  Amikacin | 572 (82.5)  106 (15.3)  11 (1.6)  3 (0.4)  1 (0.1) |
| **Dose** | **N (%)** |
| Colistimethate sodium 1 mill IU/12h  Colistimethate sodium 2 mill IU/12h  Colistimethate sodium 1,662,500 IU/12h  Gentamicin 80 mg/12h  Tobramycin 200 mg/12h  Tobramycin 300 mg/12h  Other doses | 337 (48.6)  182 (26.3)  41 (5.9)  3 (0.4)  2 (0.3)  103 (14.9)  25 (3.6) |
| **Schedule of administration** | **N (%)** |
| Continuous  Intermittent (On-Off cycles) | 583 (84.1)  110 (15.9) |
| **Duration of treatment** | **N (%)** |
| < 1 month  1-3 months  3-12 months  >12 months  n.d. | 53 (7.6)  95 (13.7)  256 (36.9)  285 (41.1)  4 (0.6) |

IA = inhaled antibiotics; n.d. = not determined.**e-Table 2:** Comparative analysis between patients for whom clinical follow-up data were available for at least one year, compared with those for whom the available data did not reach one year of follow-up.

|  | **< 1-year follow-up**  **(N = 250)** | **≥ 1-year follow-up**  **(N = 443)** | ***p* value** |
| --- | --- | --- | --- |
| **DEMOGRAPHICS** | | | |
| Gender (% of men) | 84.0 | 87.6 | n.s. |
| Age at the start of IA, years (mean ± SD) | 74.5 ± 8.7 | 73.9 ± 8.4 | n.s. |
| Smoking habit, packs/year (mean ± SD) | 51.2 ± 25.8 | 51.0 ± 27.8 | n.s. |
| Currently smoking (% of patients) | 6.8 | 5.2 | n.s. |
| Charlson comorbidity index, points (mean ± SD) | 5.6 ± 2.5 | 5.4 ± 2.2 | n.s. |
| **SYMPTOMS** | | | |
| Daily expectoration (% of patients) | 69.9 | 80.8 | **0.003** |
| Type of expectoration (% of patients)  - White  - Mucopurulent  - Purulent | 25.5  53.9  21.5 | 25.5  44.8  28.2 | n.s. |
| Degree of dyspnoea (mMRC) (mean ± SD) | 2.6 ± 0.9 | 2.4 ± 0.9 | **0.017** |
| **RESPIRATORY FUNCTION** | | | |
| FVC (mean %pred ± SD) | 65.8 ± 19.6 | 69.4 ± 20.6 | **0.025** |
| FEV1 (mean %pred ± SD) | 41.8 ± 15.3 | 44.8 ± 17.7 | **0.019** |
| FEV1/FVC (mean ± SD) | 47.3 ± 12.2 | 47.8 ± 12.0 | n.s. |
| SaO2 (mean % ± SD) | 92.2 ± 4.7 | 92.8 ± 4.0 | n.s. |
| **RADIOLOGICAL DATA** | | | |
| Presence of BE (% of patients) | 70 | 76 | n.s. |
| Lobules with BE, No. (mean ± SD) | 2.5 ± 1.2 | 2.7 ± 1.2 | n.s. |
| Presence of emphysema (% of patients) | 66.8 | 66.5 | n.s. |
| **MICROBIOLOGICAL DATA (% of patients)** | | | |
| Isolation of *Pseudomonas aeruginosa* | 92.4 | 91.2 | n.s. |
| Isolation of *Haemophilus influenzae* | 15.6 | 15.1 | n.s. |
| Isolation of *Stenotrophomonas maltophila* | 13.2 | 12.9 | n.s. |
| Isolation of *Escherichia coli* | 7.2 | 6.8 | n.s. |
| Isolation of *Staphylococcus aureus* | 4.4 | 7.2 | n.s. |
| Isolation of *Streptococcus pneumoniae* | 3.2 | 7 | **0.037** |
| Isolation of *Moraxella catarrhalis* | 4.4 | 6.1 | n.s. |
| Isolation of *Aspergillus spp* | 6.0 | 5.2 | n.s. |
| Isolation of *Achromobacter xylosoxidans* | 4.8 | 3.4 | n.s. |
| Isolation of MRSA | 3.2 | 1.6 | n.s. |
| CBI by *P. aeruginosa* | 41.6 | 49.4 | **0.047** |
| CBI by any PPM | 45.6 | 54.9 | **0.019** |
| **EXACERBATIONS DURING THE 2 YEARS BEFORE STARTING THE TREATMENT WITH IA** | | | |
| Exacerbations per year, no. (mean ± SD) | 2.9 ± 2.1 | 2.9 ± 2.2 | n.s. |
| Hospital admissions per year, no. (mean ± SD) | 1.5 ± 1.4 | 1.2 ± 1.2 | **0.002** |
| Days of hospitalization, no. (mean ± SD) | 16.7 ± 19.3 | 12.4 ± 16.3 | **0.002** |
| Patients with exacerbator phenotype in each of the 2 years (% of patients) | 87.6 | 81.5 | **0.037** |
| **TREATMENTS (% of patients)** | | | |
| LABA single inhaler | 95.2 | 93.9 | n.s. |
| LAMA single inhaler | 88.4 | 89.2 | n.s. |
| ICS | 82 | 84.7 | n.s. |
| Long-term azithromycin | 32.8 | 39.1 | n.s. |
| Roflumilast | 10.8 | 10.2 | n.s. |
| Long-term mucolytics | 31.2 | 30.2 | n.s. |
| Long-term oral corticosteroids | 20 | 11.5 | **0.002** |
| Oral cyclic antibiotics | 4 | 7.9 | **0.045** |
| Long-term oxygen therapy | 57.6 | 47.6 | **0.012** |
| Pulmonary rehabilitation programme | 34 | 37 | n.s. |
| **DATA ON IA (% of patients)** | | | |
| Previous treatment with IA | 13.9 | 13.2 | n.s. |
| Type of IA:  - Colistimethate sodium  - Tobramycin  - Gentamicin  - Others | 85.2  14.4  0.4  0 | 81  15.8  0.5  2.7 | n.s. |
| Currently under treatment | 30.4 | 35 | n.s. |
| Secondary effects | 29.2 | 23.3 | n.s. |
| Change of IA due to secondary effects | 6 | 6.3 | n.s. |
| Discontinuation of IA due to secondary effects | 17.2 | 14.9 | n.s. |
| **EFFECTIVENESS OF IA (% of patients)** | | | |
| Reduction of sputum | 59.7 | 64.6 | n.s. |
| Reduction of expectoration purulence | 43.2 | 55.3 | **.003** |
| Exitus | 44.4 | 28.4 | **< 0.001** |
| Exitus during treatment | 59.4 | 54.4 | n.s. |

BE = bronchiectasis; CBI = chronic bronchial infection; CT = computed tomography; FEV1 = forced expiratory volume in 1 second; FVC = forced vital capacity; IA = inhaled antibiotics; ICS = inhaled corticosteroids; LABA = long-acting beta-adrenoceptor agonist; LAMA = long-acting muscarinic antagonist; mMRC = modified Medical Research Council dyspnoea scale; MRSA = methicillin-resistant *Staphylococcus aureus*; n.s. = not significant; PPM = potentially pathogenic microorganisms; SaO2 = oxygen saturation; SD = standard deviation; %pred: predicted percentage.

**e-Table 3:** Comparative analysis of baseline sociodemographic and clinical characteristics of patients, as well as the effectiveness and safety of inhaled antibiotics at the end of the study, based on the persistence or eradication of airway *Pseudomonas aeruginosa*. N = 404.

|  | **NON-PA ERADICATION**  **(N = 232)a** | **PA ERADICATION**  **(N = 172)a** | ***p* value** |
| --- | --- | --- | --- |
| **SOCIODEMOGRAPHICS** | | | |
| Gender (% of men) | 87.9 | 87.8 | n.s. |
| Age at the start of IA, years (mean ± SD) | 74.4 ± 8.3 | 73.1 ± 8.4 | n.s. |
| BMI | 26.7 ± 4.8 | 26.8 ± 4.9 | n.s. |
| Currently smoking (% of patients) | 5.6 | 5.2 | n.s. |
| Smoking habit, packs/year (mean ± SD) | 48.5 ± 25.9 | 53.7 ± 29.0 | n.s. |
| Charlson comorbidity index, points (mean ± SD) | 5.4 ± 2.1 | 5.3 ± 2.4 | n.s. |
| **SYMPTOMS** | | | |
| Daily expectoration (% of patients) | 84.5 | 76.3 | n.s. |
| Type of expectoration (% of patients)  - White  - Mucopurulent  - Purulent | 26.1  41.7  31.3 | 21.6  51.6  24.8 | n.s. |
| Degree of dyspnoea (mMRC) (mean ± SD) | 2.4 ± 0.9 | 2.4 ± 0.9 | n.s. |
| **RESPIRATORY FUNCTION** | | | |
| FEV1 (mean %pred ± SD) | 44.6 ± 17.2 | 44.7 ± 18.7 | n.s. |
| FEV1/FVC (mean ± SD) | 47.7 ± 12.1 | 48.2 ± 12.1 | n.s. |
| **RADIOLOGICAL DATA** | | | |
| Presence of emphysema (% of patients) | 64.1 | 72.8 | n.s. |
| Presence of BE (% of patients) | 80.2 | 72.3 | n.s. |
| BE in lower lobules (% of patients) | 65.4 | 52.5 | 0.011 |
| Lobules with BE, No. (mean ± SD) | 2.9 ± 1.2 | 2.5 ± 1.2 | 0.005 |
| **MICROBIOLOGICAL DATA** | | | |
| CBI by any PPM (% of patients) | 60.8 | 51.2 | n.s. |
| CBI by PA (% of patients) | 59.5 | 47.1 | 0.013 |
| Isolation of *Haemophilus influenzae* at the start of IA (% of patients) | 10.3 | 17.4 | 0.038 |
| CBI by *H. influenzae* at the start of IA (% of patients) | 0.4 | 1.2 | n.s. |
| Isolation of *Stenotrophomonas maltophila* at the start of IA (% of patients) | 9.5 | 12.8 | n.s. |
| CBI by *S. maltophila* at the start of IA (% of patients) | 0.4 | 1.7 | n.s. |
| Isolation of MRSA at the start of IA (% of patients) | 1.3 | 1.2 | n.s. |
| Time between first isolation and start of IA (mean ± SD) | 13.5 ± 12.1 | 12.8 ± 12.8 | n.s. |
| **EXACERBATIONS PREVIOUS TO THE START OF IA (mean ± SD)** | | | |
| Exacerbations/year pre-IA, No. | 2.6 ± 1.7 | 2.9 ± 2.2 | n.s. |
| Admissions/year pre-IA, No. | 1.0 ± 1.1 | 1.3 ± 1.2 | 0.022 |
| Days of hospitalization, No. | 11.7 ± 15.8 | 14.0 ± 17.3 | n.s. |
| **TREATMENTS (% of patients)** | | | |
| LABA single inhaler | 12.1 | 12.2 | n.s. |
| LAMA single inhaler | 73.3 | 76.2 | n.s. |
| LABA/LAMA single inhaler | 18.1 | 14.5 | n.s. |
| ICS/LAMA single inhaler | 72.8 | 72.1 | n.s. |
| ICS single inhaler | 14.2 | 12.2 | n.s. |
| Any ICS | 85.8 | 83.7 | n.s. |
| Type of ICS:  - Fluticasone  - Budesonide  - Beclometasone | 59.1  26.1  11.8 | 61  25.3  9.6 | n.s. |
| Long-term azithromycin | 37.5 | 42.4 | n.s. |
| Roflumilast | 8.2 | 12.2 | n.s. |
| Montelukast | 2.2 | 4.7 | n.s. |
| Long-term mucolytics | 28.4 | 29.1 | n.s. |
| Long-term oral corticosteroids | 12.1 | 12.8 | n.s. |
| Oral cyclic antibiotics | 6.9 | 9.9 | n.s. |
| Long-term oxygen therapy | 48.7 | 47.7 | n.s. |
| Pulmonary rehabilitation programme | 35.5 | 40.1 | n.s. |
| **TYPE OF ia (% of patients)** | | | |
| - Colistimethate sodium  - Tobramycin  - Gentamicin  - Others | 85.8  14.2  -  - | 80.8  16.9  -  2.3 | 0.047 |
| **DURATION OF TREATMENT** | | | |
| Start of IA during exacerbation (% of patients) | 43.7 | 53 | n.s. |
| Months of treatment (mean ± SD) | 18.8 ± 14.8 | 17.4 ± 11.5 | n.s. |
| <1 month (% of patients) | 6.5 | 3.5 | n.s. |
| 1-3 months (% of patients) | 7.8 | 7 |
| 3-12 months (% of patients) | 22.1 | 25.7 |
| >12 months (% of patients) | 63.6 | 63.7 |
| **IA treatment safety** | | | |
| Adverse events (% of patients) | 27.2 | 17.4 | 0.022 |
| Adverse events, days to onset (mean ± SD) | 115.3 ± 196.4 | 105.0 ± 187.5 | n.s. |
| Main adverse events (% of patients)  - Bronchospasm  - Dyspnoea  - Discomfort  - Cough | 10.3  11.2  2.6  1.3 | 9.3  2.9  1.2  1.7 | n.s. |
| Change of IA due to adverse events (% of patients) | 8.6 | 4.1 | n.s. |
| Discontinuation of IA due to adverse events (% of patients) | 15.9 | 12.8 | n.s. |
| Days to discontinuation of IA due to adverse events (media ± dt) | 108.2 ± 149.0 | 143.3 ± 157.4 | n.s. |
| **IA treatment effectiveness** | | | |
| Reduction of expectoration (% of patients) | 64.7 | 70.3 | n.s. |
| Reduction of purulence (% of patients) | 56.9 | 58.7 | n.s. |
| Exitus (% of patients) | 32.3 | 23.3 | 0.046 |
| Exitus during treatment (% of patients) | 58 | 50 | n.s. |

BE = bronchiectasis; BMI = Body Mass Index; CBI = chronic bronchial infection; FEV1 = forced expiratory volume in 1 second; FVC = forced vital capacity; IA = inhaled antibiotics; ICS = inhaled corticosteroids; LABA = long-acting beta-adrenoceptor agonist; LAMA = long-acting muscarinic antagonist; mMRC = modified Medical Research Council dyspnoea scale; MRSA = methicillin-resistant *Staphylococcus aureus*; PA = *Pseudomonas aeruginosa*; PPM = potentially pathogenic microorganisms; SD = standard deviation; %pred = predicted percentage.

aPatients for which ≥ 1 year of follow-up data were included.

**e-Table 4:** Adverse events due to the inhaled antibiotic treatment.

|  | **N** | **% of patients** |
| --- | --- | --- |
| Bronchospasms | 73 | 10.5 |
| Dyspnoea | 61 | 8.8 |
| Cough | 12 | 1.7 |
| Unspecific | 8 | 1.1 |
| General discomfort | 7 | 1.0 |
| Oropharyngeal discomfort | 5 | 0.7 |
| Unspecified adverse eventa | 5 | 0.7 |
| Haemoptysis | 5 | 0.7 |
| Spirometric impairment | 3 | 0.4 |
| Thoracic pain | 2 | 0.3 |
| Asthenia | 2 | 0.3 |
| Facial erythema | 2 | 0.3 |
| Insomnia | 1 | 0.1 |
| HBP | 1 | 0.1 |
| Renal function decline | 1 | 0.1 |

HBP = high blood pressure.

aThe type of adverse event was not registered.

**e-Figure 1 -** Evolution of patients before and after treatment with inhaled antibiotics for at least three months: (A) number of exacerbations and hospital admissions, (B) percentage of patients with exacerbator phenotype. IA = inhaled antibiotics. N = 387. § = *p* < 0.001 in respect to the year before IA; # = *p* = .005; ¥ = *p* = 0.001 in respect to the two years before.


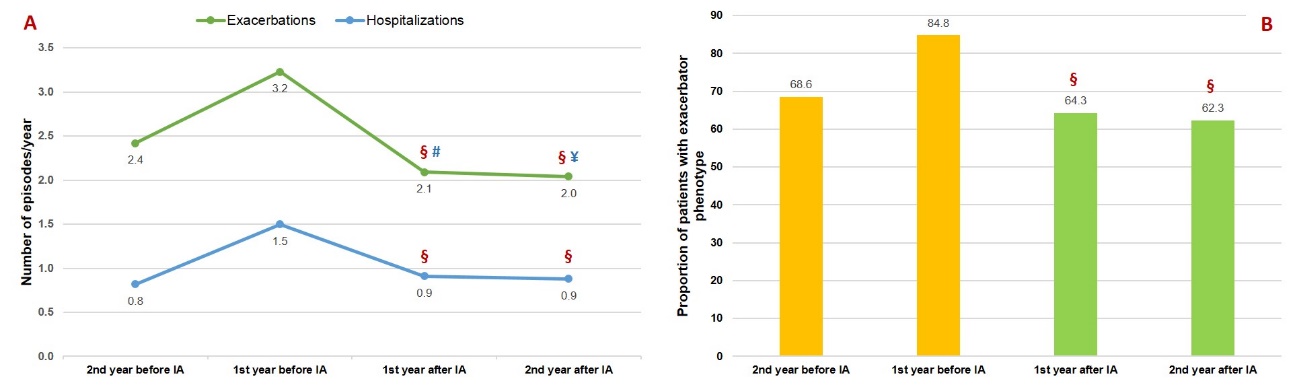


**e-Figure 2 -** Microbiological profile before and after inhaled antibiotic therapy. Data refer to the last sputum sample collected per patient before treatment and the first one after that. N = 443. IA = inhaled antibiotics; MRSA = methicillin-resistant *Staphylococcus aureus*; NTM = non-tuberculous mycobacteria; PPM = potentially pathogenic microorganisms.

**
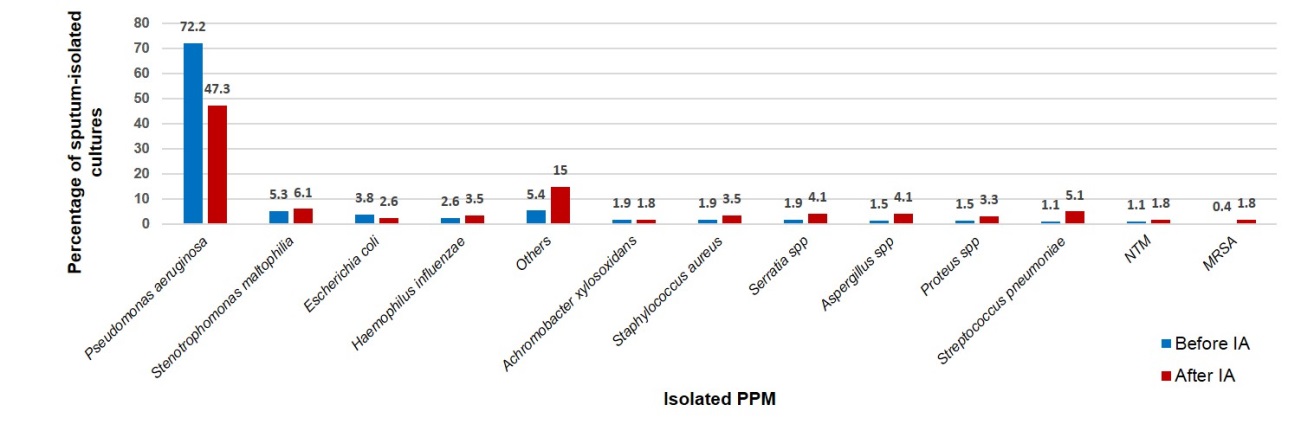
**
